# Supplementary material
Source: publisher figshare collection journal article supplement (https://frontiersin.figshare.com/ndownloader/files/38223606)
Supplement: Supplementary file 1 [file 38223606]

Supporting Information for

**Limited predictability of body length in a fish population**

Lin Wang1,2*, Ting Wang1

*To whom correspondence should be addressed. Email: lwang1253@yeah.net

**This file includes:**

**Figure S1.** Changes in body length at age across ages 3–12y from year 1946 to 2004 (original data comes from Eikeset et al. 10.1073/pnas.1525749113).

**Figure S2.** Chaos detection of time series without noise. (A, D and G) Original data without noise; (B, E and H) Attractor reconstruction; (C, F and I) Lyapunov exponent of body length: *D* is the neighborhood radius, *m* is the embedding dimension and *C* is the correlation integral, which is influenced by both *D* and *m*. In each rectangle, *m* varies from 5 to 12 (from top line to bottom line, *m*=11 can be obtained for each case when the rate of change of ln*C*(*m*, *D*) with ln*D* does not change with the increase of *m*). Body length class I (*S1*), class II (*S2*) and class III (*S3*).

**Figure S3.** Bifurcation diagrams of the biomass *C1* vary with each ecological parameter. All parameters are presented in table 1 except for *V1*=*V2*=*V3*=*V4*=0; the initial value of Eq. (1) is (0.1, 0.1, 0.03, 0.02, 0.03, 0.01, 0.01, 2.2, 2.4, 2.8, 3).


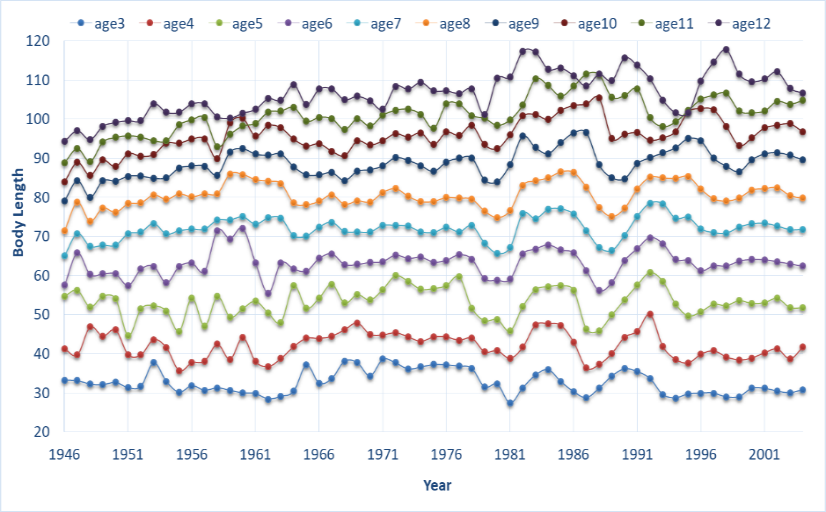


Figure S1. Changes in body length at age across ages 3–12y from year 1946 to 2004 (original data comes from Eikeset et al. 10.1073/pnas.1525749113).


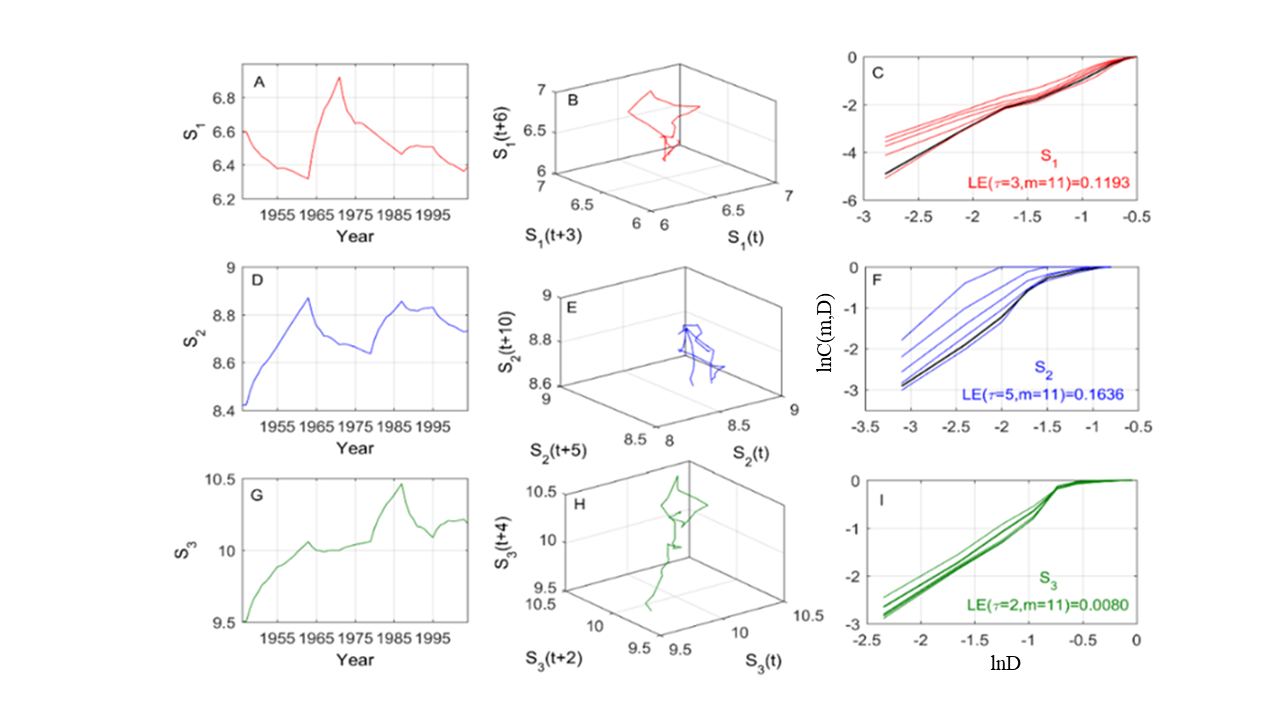


Figure S2. Chaos detection of time series without noise. (A, D and G) Original data without noise; (B, E and H) Attractor reconstruction; (C, F and I) Lyapunov exponent of body length: *D* is the neighborhood radius, *m* is the embedding dimension and *C* is the correlation integral, which is influenced by both *D* and *m*. In each rectangle, *m* varies from 5 to 12 (from top line to bottom line, *m*=11 can be obtained for each case when the rate of change of ln*C*(*m*, *D*) with ln*D* does not change with the increase of *m*). Body length class I (*S1*), class II (*S2*) and class III (*S3*).


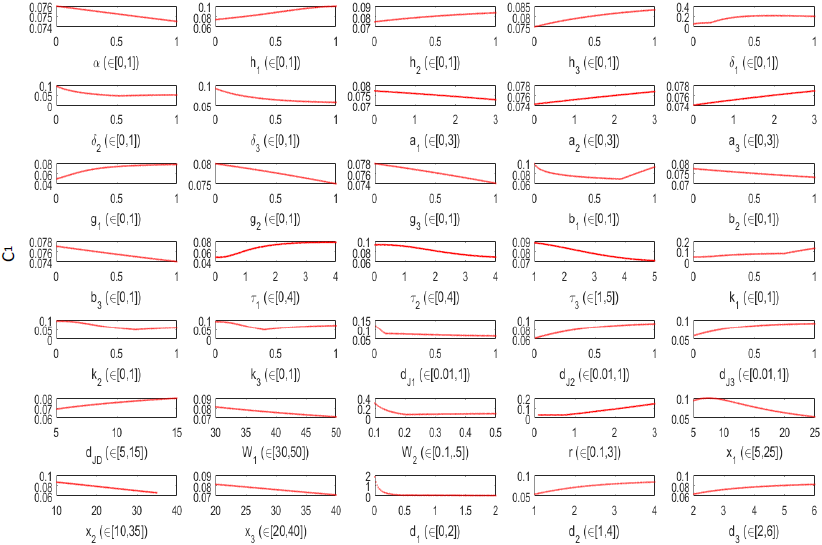


Figure S3. Bifurcation diagrams of the biomass *C1* vary with each ecological parameter. All parameters are presented in table 1 except for *V1*=*V2*=*V3*=*V4*=0; the initial value of Eq. (1) is (0.1, 0.1, 0.03, 0.02, 0.03, 0.01, 0.01, 2.2, 2.4, 2.8, 3).
